# Supplementary material for: Controlling the anisotropic magnetic dipolar interactions of PbSe self-assembled nanoparticles on GaAs
Source: Royal Society of Chemistry journal article supplement (doi:10.1039/b905341g), 2009-01-01
Supplement: b905341g.pdf [file b905341g.pdf]

Supplementary Material (ESI) for PCCP

This journal is © the Owner Societies 2009

### Supplementary Material

## Controlling the Anisotropic Magnetic Dipolar Interactions of PbSe Self-Assembled Nanoparticles on GaAs

Alexander Zakrassov,<sup>a</sup> Arkady Bitler,<sup>b</sup> Lioz Etgar<sup>c</sup>, Gregory Leitus,<sup>b</sup> Efrat Lifshitz,<sup>c</sup> and Ron Naaman<sup>a</sup>

a) Department of Chemical Physics

b) Chemical Research Support,

The Weizmann Institute of Science, Rehovot, Israel 76100

c) Faculty of Chemistry, Nanoscience and Nanotechnology Program,

Technion, Haifa, Israel 32000.

e-mail: [Ron.Naaman@weizmann.ac.il](mailto:Ron.Naaman@weizmann.ac.il)

### **Synthesis of the nanoparticles:**

Lead acetate trihydrate (Pb-Ac,  $\text{Pb}[\text{CH}_3\text{COO}]_2 \cdot 3\text{H}_2\text{O}$ , GR) was purchased from Merck. PhEt ( $\text{C}_6\text{H}_5\text{OC}_6\text{H}_5$ , 99%), oleic acid (OA,  $\text{CH}_3(\text{CH}_2)_7\text{CH}=\text{CH}(\text{CH}_2)_7\text{COOH}$ , 99.8%), trioctylphosphine (TOP,  $(\text{C}_8\text{H}_{17})_3\text{P}$ ), and selenium (Se, 99.995% purity) were all purchased from Aldrich.

The synthesis of a PbSe nanoparticle (NP) core covered with organic surfactant followed a modified procedure reported earlier<sup>1</sup> and included the following stages: 1) 0.71 g of lead acetate trihydrate [Pb-AC] was dissolved in a solution that was composed of 2 mL of PhEt, 1.5 mL of oleic acid (OA), and 8 mL of trioctylphosphine (TOP), under standard inert conditions in the glove box, which was inserted into a three-necked flask (flask I) ; 2) 10 mL of PhEt was inserted into a three-necked flask (flask II) under the inert conditions of the glove box; 3) both flasks were removed from the glove box and were placed on a Schlenk line and then heated under a vacuum to 100-120 °C for an hour;

Supplementary Material (ESI) for PCCP

This journal is © the Owner Societies 2009

4) flask I was cooled to 45 °C, and flask II was heated to 180-210 °C, both under stream of argon gas; 5) 0.155g of selenium powder was dissolved in 2.0 mL of TOP, forming a TOP:Se solution, under standard inert conditions of a glove box; then, 1.7 mL of this solution was injected into flask I on the Schlenk line; and 6) the contents of flask I, containing the reaction precursors, was rapidly injected into the PhEt solution in flask II, reducing its temperature to 100-130 °C, leading to the formation of PbSe NPs within the first 15 min of the reaction. The procedure described produced nearly monodispersed NPs with a <5% size distribution, and with an average size between 3 nm and 9 nm, controlled by the temperature and by the duration of the reaction.

### **Adsorption of the nanoparticles and their characterization**

The PbSe NPs, with diameters of 4.5 nm, were attached to a p-type GaAs (AXT company) surface through self-assembled monolayers of 1,8-octanedithiol and 1,4-benzenedimethanethiol (Sigma–Aldrich Co). The process followed that described in reference 2. The GaAs slides were cleaned, prior to the adsorption, by acetone, n-hexane and ethanol and by an ultraviolet ozone cleaning system (UVOC model T10/OES/E) for 25 min, after which, they were immersed in a concentrated HCl solution for 1 min followed by a 3% NH<sub>4</sub>OH solution for 30 s to remove the oxides. The slides were then immersed in a 1mM solution of the specific compound in ethanol (overnight deposition) and then washed with ethanol. A WVASE32 spectroscopic ellipsometer was used to obtain the effective thickness of the monolayer at an incident angle of 70°. The measurements were performed at wavelengths between 250 and 1100 nm, with sampling steps of 5 nm.

In addition to ellipsometry, the quality of the monolayer was also verified by atomic force microscopy (P47 SolverAFM NT-MDT Ltd., Russia), using AC240 probes (Olympus, Japan) and contact potential difference measurements (CPD) using a Kelvin Probe (Besocke Delta Phi GmbH). The AFM measurements provided the nanoparticle density (about  $6.0 \times 10^{10} \text{ cm}^{-2}$  for both monolayers) and distribution on the surface (Fig. 3). Zero-field-cooled (ZFC) and field-cooled (FC) measurements were performed with a SQUID (superconducting quantum interference device) magnetometer MPMS2 (magnetic property measurement system 2) with an absolute sensitivity of  $10^{-7}$  emu with the magnetic field applied either parallel or perpendicular to the sample plane. The

Supplementary Material (ESI) for PCCP

This journal is © the Owner Societies 2009

samples were then placed in plastic straws, which have a low background contribution to the magnetic moment (about  $10^{-6}$  emu at 1 T).

**References:**

- (1) Brumer, M.; Kigel, A.; Amirav, L.; Sashchiuk, A.; Solomesch, O.; Tessler, N.; Lifshitz, E. *Adv. Func. Mater.* **2005**, *15*, 1111.
- (2) Aqua, T.; Cohen, H.; Vilan, A.; Naaman, R. *J. Phys. Chem. C.* **2007**, *111*, 16313.
